# Supplementary material
Source: PubMed Central journal article supplement (PMC6916468)

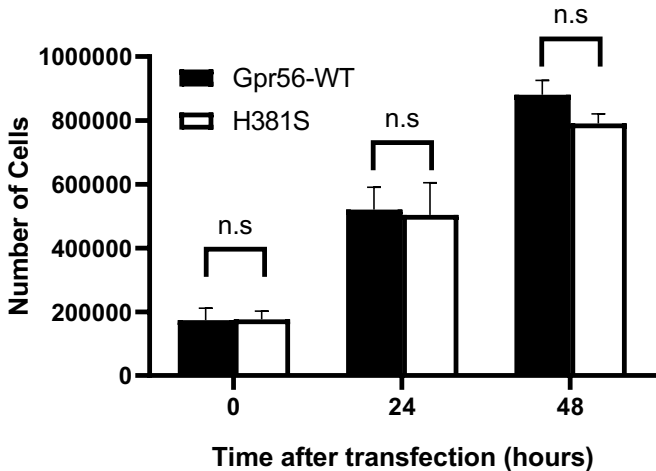

Supplement: supp_RA119.008234_Supplementary-Figure1.pdf [file supp_RA119.008234_Supplementary-Figure1.pdf]
